# Supplementary material for: Association between serum uric acid and measures of adiposity in Chinese adults: a cross-sectional study
Source: HighWire-hosted journal article supplement (doi:10.1136/bmjopen-2023-072317), 2023-05-01
Supplement: bmjopen-2023-072317supp001_data_supplement.pdf [file bmjopen-2023-072317supp001_data_supplement.pdf]

**Supplementary Table 1** Comparison of common methods for measuring body fat

| <b>Method</b>                                     | <b>Advantages</b>                                                                                                                                                                                                                                                         | <b>Disadvantages</b>                                                                                                                                                                                                                    |
|---------------------------------------------------|---------------------------------------------------------------------------------------------------------------------------------------------------------------------------------------------------------------------------------------------------------------------------|-----------------------------------------------------------------------------------------------------------------------------------------------------------------------------------------------------------------------------------------|
| Nuclear<br>Magnetic<br>Resonance<br>Imaging (MRI) | <ol style="list-style-type: none"> <li>1. Non-invasive</li> <li>2. High spatial resolution</li> <li>3. Can distinguish between subcutaneous and visceral fat</li> <li>4. Can measure other body tissues such as muscle and organs</li> </ol>                              | <ol style="list-style-type: none"> <li>1. Expensive</li> <li>2. Time-consuming</li> <li>3. Limited availability</li> <li>4. Cannot be used in patients with metal implants or claustrophobia</li> </ol>                                 |
| Computed<br>Tomography<br>(CT)                    | <ol style="list-style-type: none"> <li>1. Non-invasive</li> <li>2. High spatial resolution</li> <li>3. Can distinguish between subcutaneous and visceral fat</li> <li>4. Can measure other body tissues such as bone and organs</li> <li>5. Fast scanning time</li> </ol> | <ol style="list-style-type: none"> <li>1. Expensive</li> <li>2. Radiation exposure</li> <li>3. Cannot be used in patients with metal implants or claustrophobia</li> <li>4. Cannot be used in patients with renal impairment</li> </ol> |
| Dual-Energy<br>X-ray<br>Absorptiometry<br>(DEXA)  | <ol style="list-style-type: none"> <li>1. Non-invasive</li> <li>2. Low radiation exposure</li> <li>3. Can measure bone mineral density and lean mass</li> <li>4. Can distinguish between subcutaneous and visceral fat in the abdominal region</li> </ol>                 | <ol style="list-style-type: none"> <li>1. Limited spatial resolution</li> <li>2. Limited availability</li> <li>3. Cannot measure visceral fat outside the abdominal region</li> </ol>                                                   |
| Bioelectrical<br>Impedance<br>Analysis (BIA)      | <ol style="list-style-type: none"> <li>1. Non-invasive</li> <li>2. Low cost</li> <li>3. Can be used in outpatient settings</li> <li>4. Can measure body composition (fat mass and lean mass)</li> <li>5. Can track changes over time</li> </ol>                           | <ol style="list-style-type: none"> <li>1. Limited accuracy</li> <li>2. Affected by hydration status</li> <li>3. Cannot distinguish between subcutaneous and visceral fat</li> </ol>                                                     |

**Supplementary Table 2: AUCs of VFA, BFP, BMI and their combination for diagnosing hyperuricemia**

| Variables                | AUC    | 95%CI low | 95%CI up | Best threshold | Specificity | Sensitivity |
|--------------------------|--------|-----------|----------|----------------|-------------|-------------|
| BFP (%)                  | 0.5515 | 0.5424    | 0.5607   | 30.8500        | 0.3653      | 0.7468      |
| VFA (cm <sup>2</sup> )   | 0.5782 | 0.5689    | 0.5874   | 77.3500        | 0.4468      | 0.6889      |
| BMI (kg/m <sup>2</sup> ) | 0.6883 | 0.6797    | 0.6969   | 24.5500        | 0.5577      | 0.7148      |
| Model 1                  | 0.8052 | 0.7984    | 0.8120   | -1.3249        | 0.6074      | 0.8731      |
| Model 2                  | 0.7495 | 0.7419    | 0.7570   | -1.5425        | 0.5507      | 0.8323      |
| Model 3                  | 0.8053 | 0.7985    | 0.8121   | -1.3360        | 0.6024      | 0.8776      |
| Model 4                  | 0.7951 | 0.7883    | 0.8018   | -1.2320        | 0.5973      | 0.8751      |

Model 1: (Age+gender+BMI+BFP+VFA):  $\text{logit}(\text{hyperuricemia}) = -6.00014 + 0.05207 \cdot \text{BFP} - 0.00397 \cdot \text{VFA} + 0.12259 \cdot \text{BMI} + 2.66719 \cdot \text{SEX} - 0.02771 \cdot \text{AGE}$ . Model 2(BFP+BMI+VFA):  $\text{logit}(\text{hyperuricemia}) = -4.68798 - 0.15314 \cdot \text{BFP} + 0.01298 \cdot \text{VFA} + 0.25787 \cdot \text{BMI}$ . Model 3(BFP+BMI+Sex+Age):  $\text{logit}(\text{hyperuricemia}) = -5.56092 + 0.03729 \cdot \text{BFP} + 0.10761 \cdot \text{BMI} + 2.63569 \cdot \text{SEX} - 0.02747 \cdot \text{AGE}$ . Model 4(BMI+BFP+Sex):  $\text{logit}(\text{hyperuricemia}) = -6.91626 + 0.02620 \cdot \text{BFP} + 0.12173 \cdot \text{BMI} + 2.59018 \cdot \text{SEX}$ . AUC, area under curve; VFA: Visceral fat area; BFP: body fat percentage; BMI: body mass index.

**Supplementary Table 3: Hyperuricemia in normal-weight and lean populations (BMI<25 kg/m<sup>2</sup>) with higher VFA and BFP**

| Hyperuricemia          | No                  | Yes                  | <i>P</i> -value |
|------------------------|---------------------|----------------------|-----------------|
| Female (n)             | 5658                | 172                  |                 |
| VFA (cm <sup>2</sup> ) | 73.20 (59.80-92.30) | 88.15 (72.25-105.93) | <0.001          |
| BFP (%)                | 29.70 (26.10-33.00) | 32.35 (29.28-34.90)  | <0.001          |
| Male (n)               | 3443                | 1299                 |                 |
| VFA (cm <sup>2</sup> ) | 62.40 (50.70-74.05) | 67.40 (55.70-78.20)  | <0.001          |
| BFP (%)                | 21.40 (18.20-24.30) | 22.80 (19.70-25.50)  | <0.001          |

VFA: Visceral fat area; BFP: body fat percentage.

**Supplementary Table 4:** AUCs of VFA, BFP, BMI and their combination for diagnosing hyperuricemia in normal-weight and lean populations

| Variables                | AUC    | 95%CI low | 95%CI up | Best threshold | Specificity | Sensitivity |
|--------------------------|--------|-----------|----------|----------------|-------------|-------------|
| BFP (%)                  | 0.6343 | 0.6204    | 0.6482   | 27.3500        | 0.4458      | 0.7967      |
| VFA (cm <sup>2</sup> )   | 0.4887 | 0.4737    | 0.5038   | 66.1500        | 0.4510      | 0.5758      |
| BMI (kg/m <sup>2</sup> ) | 0.6401 | 0.6257    | 0.6546   | 22.9500        | 0.5882      | 0.6281      |
| Model 1                  | 0.8031 | 0.7923    | 0.8140   | -1.6037        | 0.6712      | 0.8355      |

Model 1: (Age+gender+BMI+BFP+VFA):  $\text{logit}(\text{hyperuricemia}) = -6.56135 + 0.04708 \cdot \text{BFP} + 0.00246 \cdot \text{VFA} + 0.11388 \cdot \text{BMI} + 2.88429 \cdot \text{SEX} - 0.02269 \cdot \text{AGE}$ . ROC, receiver operating characteristic; AUC, area under curve; VFA: Visceral fat area; BFP: body fat percentage; BMI: body mass index.

**Supplementary Table 5** AUCs of VFA, BFP, BMI and their combination for diagnosing hyperuricemia with lower cut-off value

| Variables                | AUC    | 95%CI low | 95%CI up | Best threshold | Specificity | Sensitivity |
|--------------------------|--------|-----------|----------|----------------|-------------|-------------|
| BFP (%)                  | 0.5257 | 0.5173    | 0.5341   | 28.6500        | 0.4906      | 0.5691      |
| VFA (cm <sup>2</sup> )   | 0.5849 | 0.5767    | 0.5932   | 75.1500        | 0.4683      | 0.6687      |
| BMI (kg/m <sup>2</sup> ) | 0.6792 | 0.6715    | 0.6869   | 24.5500        | 0.6559      | 0.6055      |
| Model 1                  | 0.7588 | 0.7519    | 0.7656   | 0.6638         | 0.7372      | 0.6680      |

Model 1: (Age+Sex+BMI+BFP):  $\text{logit}(\text{hyperuricemia}) = -3.55374 + 0.04016 \cdot \text{BFP} + 0.11282 \cdot \text{BMI} + 1.78541 \cdot \text{SEX} - 0.01624 \cdot \text{AGE}$ ; VFA: Visceral fat area; BFP: body fat percentage; BMI: body mass index.

**Supplementary Table 6** Hyperuricemia in normal-weight and lean populations

(BMI < 25 kg/m<sup>2</sup>) with higher VFA and BFP with lower cut-off value

| Hyperuricemia          | No                   | Yes                 | P-value |
|------------------------|----------------------|---------------------|---------|
| Female (n)             | 3877                 | 1953                |         |
| VFA (cm <sup>2</sup> ) | 71.10 (15.60-202.80) | 78.70 (5.00-185.10) | <0.001  |
| BFP (%)                | 29.10 (9.90-47.50)   | 30.80 (3.00-50.90)  | <0.001  |
| Male (n)               | 1413                 | 3329                |         |
| VFA (cm <sup>2</sup> ) | 60.70 (7.00-116.60)  | 65.30 (5.00-143.30) | <0.001  |
| BFP (%)                | 20.80 (3.00-33.70)   | 22.20 (3.00-36.50)  | <0.001  |

VFA: Visceral fat area; BFP: body fat percentage.

**Supplementary Table 7** AUCs of VFA, BFP, BMI and their combination for diagnosing hyperuricemia with lower cut-off value in normal-weight and lean populations

| Variables                | AUC    | 95%CI low | 95%CI up | Best threshold | Specificity | Sensitivity |
|--------------------------|--------|-----------|----------|----------------|-------------|-------------|
| BFP (%)                  | 0.5809 | 0.5701    | 0.5918   | 26.8500        | 0.5147      | 0.6310      |
| VFA (cm <sup>2</sup> )   | 0.5095 | 0.4985    | 0.5205   | 63.5500        | 0.4136      | 0.6229      |
| BMI (kg/m <sup>2</sup> ) | 0.6199 | 0.6093    | 0.6306   | 22.2500        | 0.5183      | 0.6660      |
| Model 1                  | 0.7268 | 0.7172    | 0.7363   | 0.1676         | 0.7552      | 0.6126      |

Model 1: (Age+Sex+BMI+BFP+VFA):  $\text{logit}(\text{hyperuricemia}) = -3.95982 + 0.05135 \cdot \text{BFP} - 0.00202 \cdot \text{VFA} + 0.11849 \cdot \text{BMI} + 1.87699 \cdot \text{SEX} - 0.01456 \cdot \text{AGE}$ . ROC, receiver operating characteristic; AUC, area under curve; VFA: Visceral fat area; BFP: body fat percentage; BMI: body mass index.

**Supplementary Figure 1:** ROC curves of hyperuricemia with lower cutoff value for BMI, VFA, BFP, and the combined model.

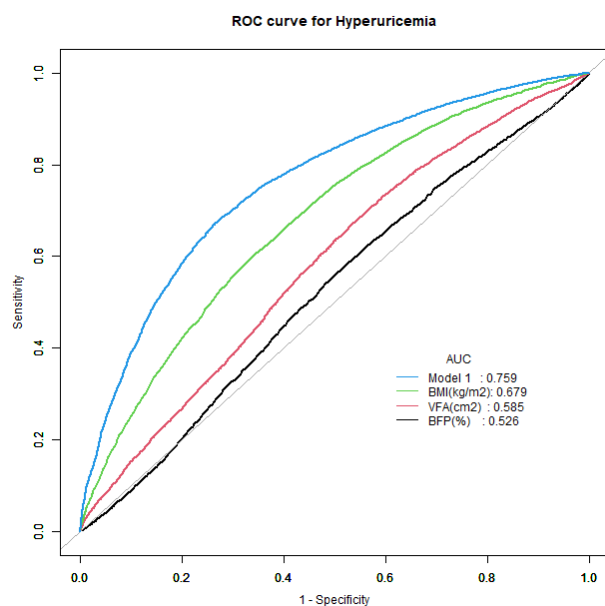

Model 1: (Age+Sex+BMI+BFP):  $\text{logit}(\text{hyperuricemia}) = -3.55374 + 0.04016 \cdot \text{BFP} + 0.11282 \cdot \text{BMI} + 1.78541 \cdot \text{SEX} - 0.01624 \cdot \text{AGE}$ ; VFA: Visceral fat area; BFP: body fat percentage; BMI: body mass index. **Abbreviation:** ROC, receiver operating characteristic; AUC, area under curve; VFA: Visceral fat area; BFP: body fat percentage; BMI: body mass index.

**Supplementary Figure 2:** ROC curves of hyperuricemia with lower cutoff value in normal and lean populations for BMI, VFA, BFP BMI, VFA, BFP, and the combined model

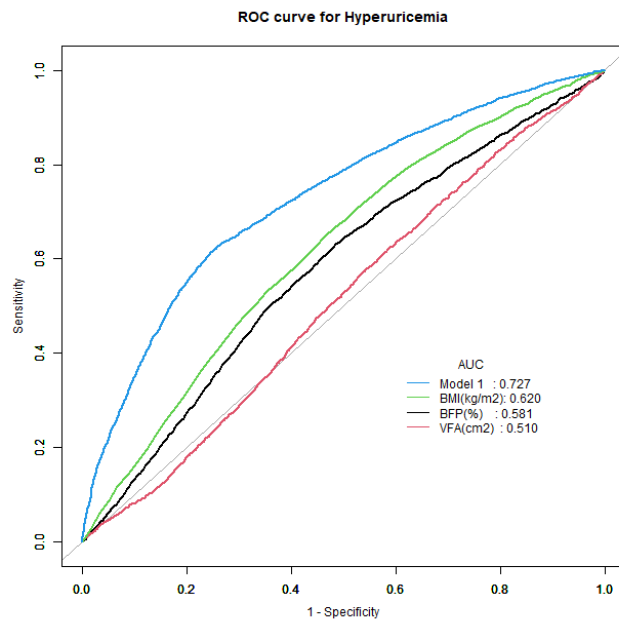

Model 1: (Age+Sex+BMI+BFP+VFA):  $\text{logit}(\text{hyperuricemia}) = -3.95982 + 0.05135 \cdot \text{BFP} - 0.00202 \cdot \text{VFA} + 0.11849 \cdot \text{BMI} + 1.87699 \cdot \text{SEX} - 0.01456 \cdot \text{AGE}$ . ROC, receiver operating characteristic; AUC, area under curve; VFA: Visceral fat area; BFP: body fat percentage; BMI: body mass index.

**Abbreviation:** ROC, receiver operating characteristic; AUC, area under curve; VFA: Visceral fat area; BFP: body fat percentage; BMI: body mass index.
